# Supplementary material for: Bioactive selaginellins from Selaginella tamariscina (Beauv.) Spring
Source: publisher site journal article supplement (doi:10.3762/bjoc.8.217), 2012-11-05
Supplement: Additional file 1 [file 1860-5397-8-217-S1.pdf]

## **Supporting Information**

**for**

### **Bioactive selaginellins from *Selaginella tamariscina* (Beauv.) Spring**

Chao Yang <sup>\*1,2</sup>, Yutian Shao <sup>1</sup>, Kang Li <sup>1</sup> and Wujiong Xia <sup>1</sup>

Address: <sup>1</sup> State Key Lab of Urban Water Resource and Environment & the Academy of Fundamental and Interdisciplinary Sciences, Harbin Institute of Technology, Harbin 150080, PR China and <sup>2</sup> State Key Lab of Applied Organic Chemistry, Lanzhou University, Lanzhou 730000, PR China

Email: Chao Yang\* - xyyang@hit.edu.cn

\* Corresponding author

**Spectroscopic data and other relevant information for compounds 1–4.**

## Table of Contents

|                       |                                                                                       |         |
|-----------------------|---------------------------------------------------------------------------------------|---------|
| <b>Figure S1</b>      | $^1\text{H}$ NMR (400 MHz, $\text{CD}_3\text{COCD}_3$ ) of compound <b>1</b> .....    | S3      |
| <b>Figure S2</b>      | $^{13}\text{C}$ NMR (100 MHz, $\text{CD}_3\text{COCD}_3$ ) of compound <b>1</b> ..... | S3      |
| <b>Figure S3</b>      | $^1\text{H}$ - $^1\text{H}$ COSY of compound <b>1</b> .....                           | S4      |
| <b>Figure S4</b>      | HMQC of compound <b>1</b> .....                                                       | S5      |
| <b>Figure S5</b>      | HMBC of compound <b>1</b> .....                                                       | S6      |
| <b>Figure S6-S10</b>  | $^1\text{H}$ , $^{13}\text{C}$ and 2D NMR spectra of compound <b>2</b> .....          | S7–S9   |
| <b>Figure S11-S15</b> | $^1\text{H}$ , $^{13}\text{C}$ and 2D NMR spectra of compound <b>3</b> .....          | S10–S12 |
| <b>Figure S16-S20</b> | $^1\text{H}$ , $^{13}\text{C}$ and 2D NMR spectra of compound <b>4</b> .....          | S13–S15 |
| <b>Table S1</b>       | Cytotoxic activity data for compounds <b>1–3</b> .....                                | S16     |
| <b>Table S2</b>       | Antioxidant activity data for compounds <b>1–3</b> .....                              | S16     |

**Figure S1:**  $^1\text{H}$  NMR (400 MHz,  $\text{CD}_3\text{COCD}_3$ ) of compound **1**

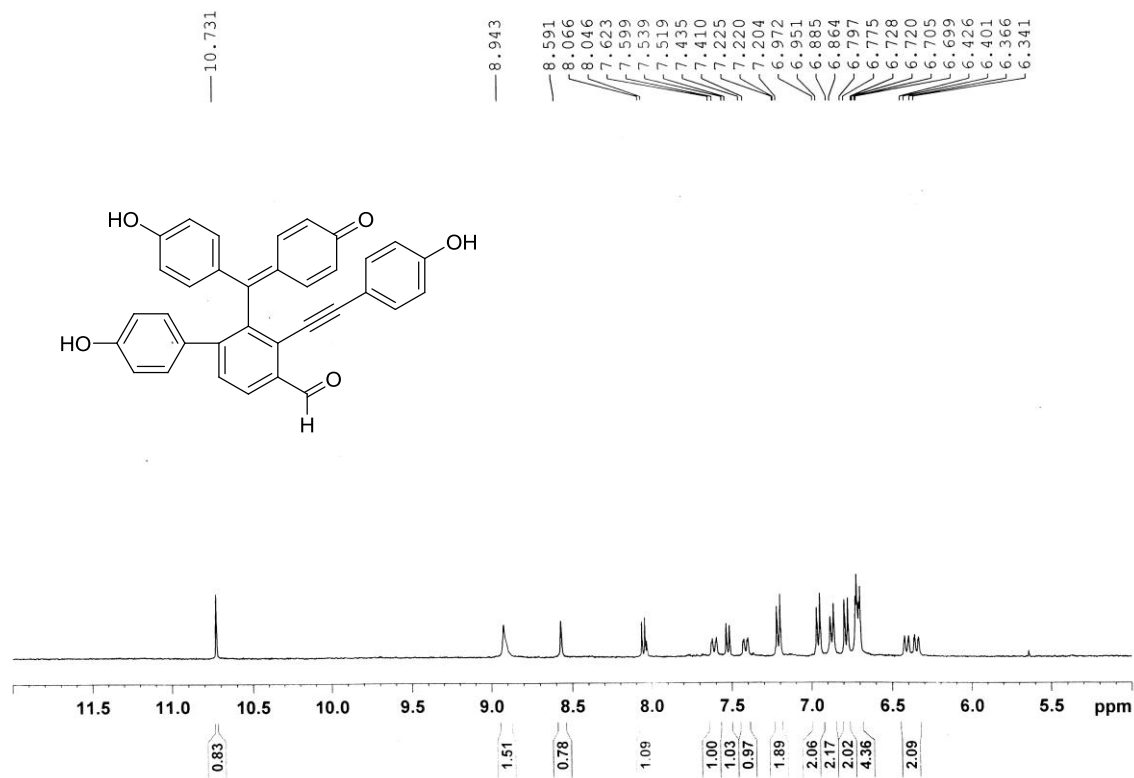

**Figure S2:**  $^{13}\text{C}$  NMR (100 MHz,  $\text{CD}_3\text{COCD}_3$ ) of compound **1**

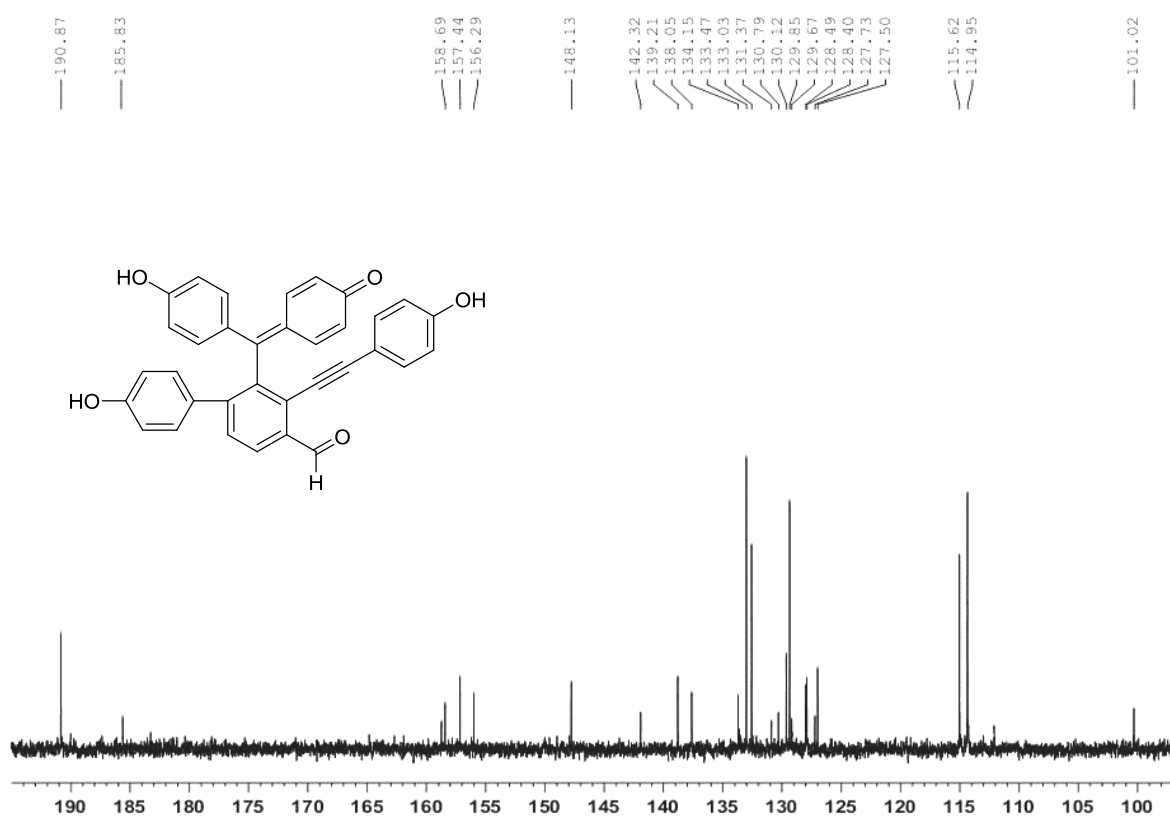

**Figure S3:**  $^1\text{H}$ - $^1\text{H}$  COSY of compound **1**

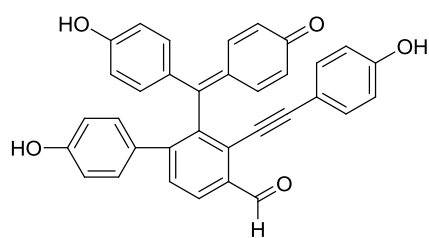

Selaginellin O

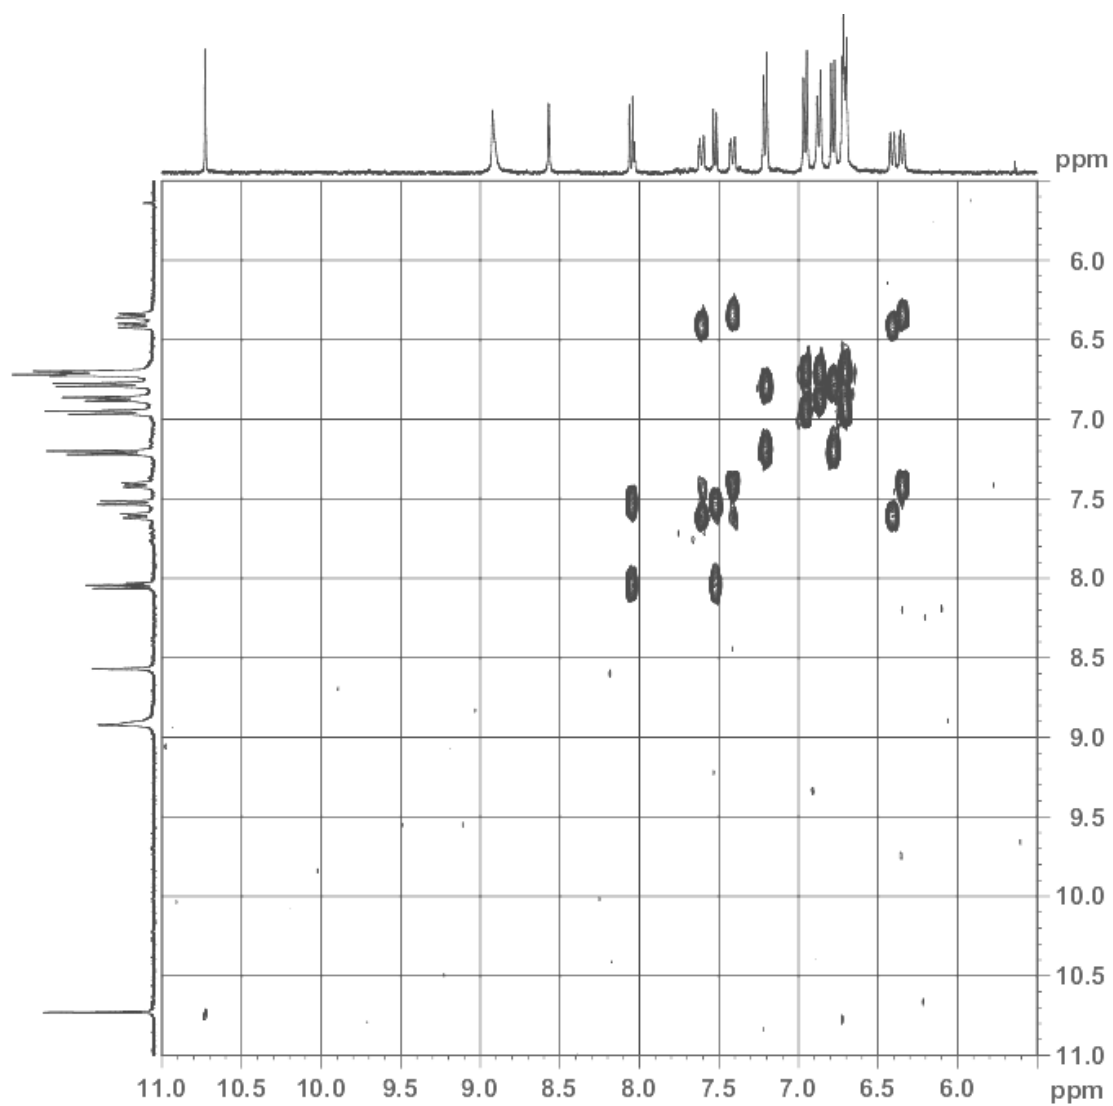

**Figure S4:** HMQC of compound **1**

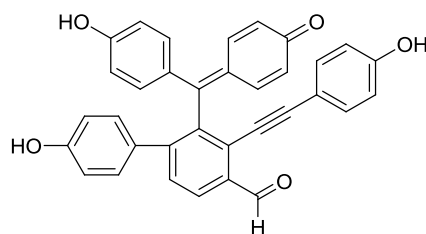

Selaginellin O

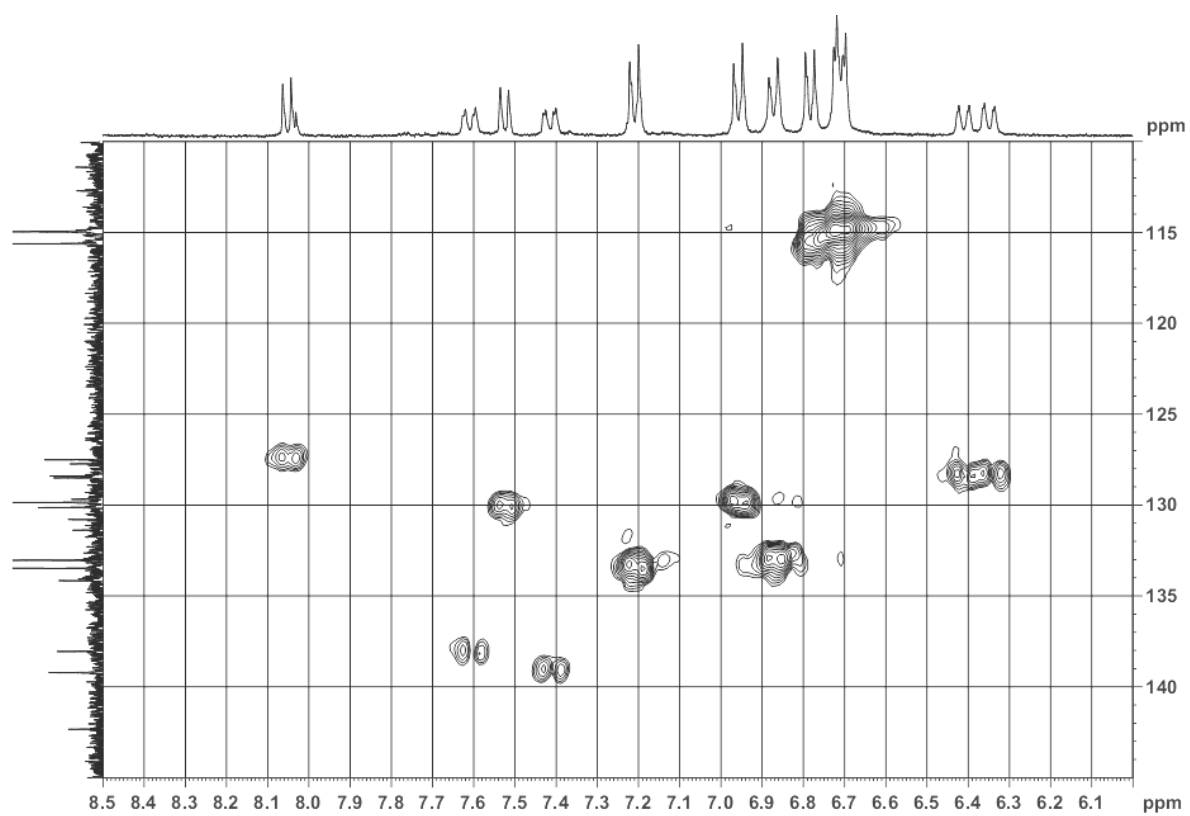

**Figure S5:** HMBC of compound **1**

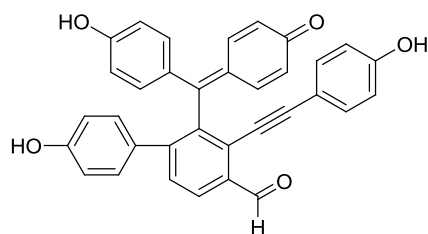

Selaginellin O

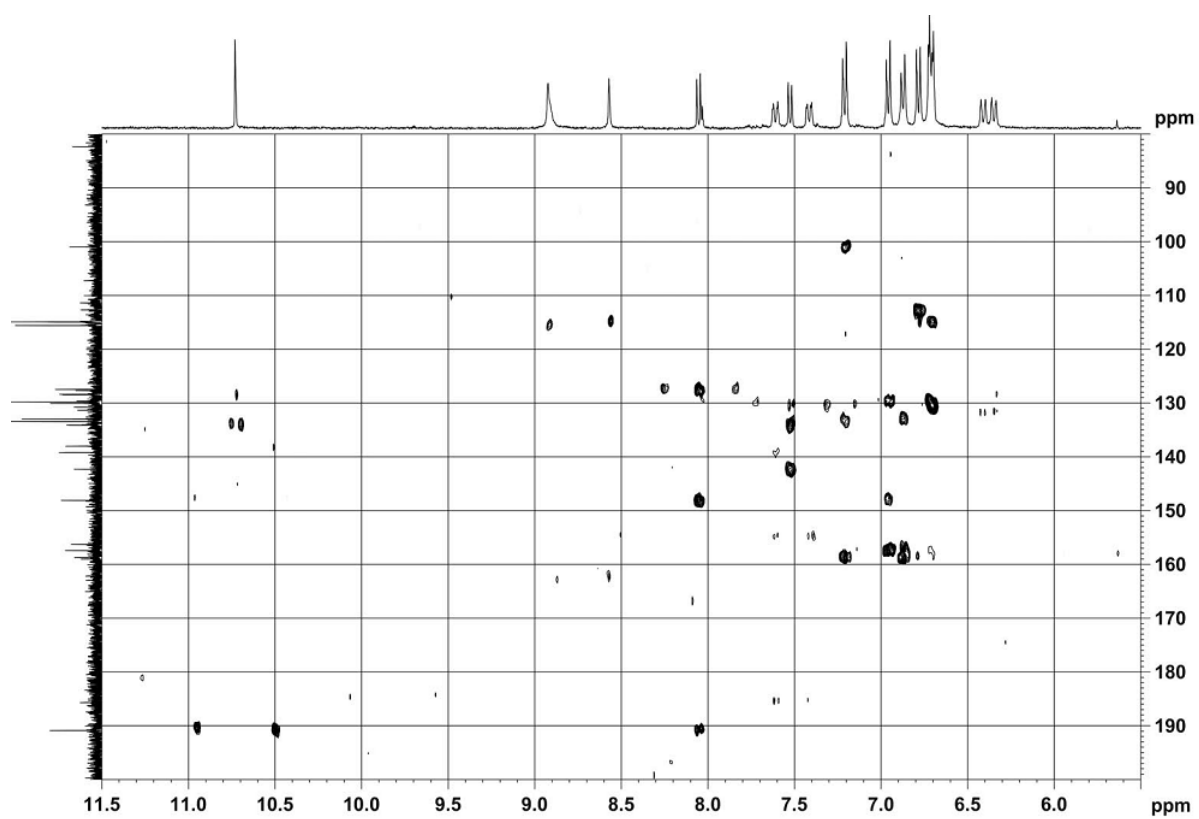

Chemical structure of Selaginellin M is shown above the <sup>1</sup>H NMR spectrum. The structure is a complex polycyclic molecule featuring a central benzene ring substituted with a 4-methoxyphenyl group, a 4-hydroxyphenyl group, and a 4-hydroxyphenyl group connected via an ethynyl bridge. The central ring also has a hydroxymethyl group and a side chain containing a ketone and a double bond.

<sup>1</sup>H NMR spectrum (CDCl<sub>3</sub>) of Selaginellin M is displayed below the structure. The spectrum shows peaks in the aromatic region (6.3–8.4 ppm) and a small peak in the aliphatic region (3.7 ppm). Integration values are provided below the baseline.

| Chemical Shift (ppm) | Integration |
|----------------------|-------------|
| 8.363                | 0.74        |
| 8.309                | 0.77        |
| 7.789                | 1.00        |
| 7.537                | 1.13        |
| 7.512                | 1.02        |
| 7.391                | 1.11        |
| 7.371                | 2.21        |
| 7.355                | 4.88        |
| 7.348                | 4.55        |
| 7.330                | 2.14        |
| 7.324                | 2.15        |
| 7.130                |             |
| 7.123                |             |
| 7.118                |             |
| 7.107                |             |
| 7.102                |             |
| 7.095                |             |
| 6.930                |             |
| 6.925                |             |
| 6.913                |             |
| 6.908                |             |
| 6.901                |             |
| 6.895                |             |
| 6.890                |             |
| 6.879                |             |
| 6.874                |             |
| 6.867                |             |
| 6.822                |             |
| 6.816                |             |
| 6.810                |             |
| 6.798                |             |
| 6.793                |             |
| 6.776                |             |
| 6.769                |             |
| 6.764                |             |
| 6.753                |             |
| 6.741                |             |
| 6.715                |             |
| 6.679                |             |
| 6.672                |             |
| 6.667                |             |
| 6.655                |             |
| 6.650                |             |
| 6.381                |             |
| 6.376                |             |
| 6.356                |             |
| 6.351                |             |
| 6.338                |             |
| 6.334                |             |
| 6.314                |             |
| 6.309                |             |
| 5.023                |             |
| 5.009                |             |
| 3.787                | 2.99        |

**Selaginellin M**

COc1ccc(cc1)/C(=C2/C(=C3C(=C2)C(=CC3)C(=O)C4=CC=C(C=C4)O)C#CC5=CC=C(C=C5)O)C6=CC=C(C=C6)O  
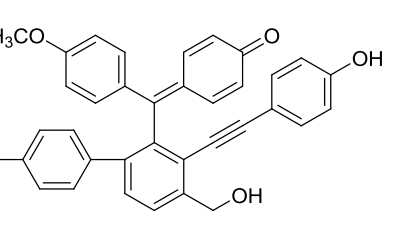

The chemical structure of Selaginellin M is a complex polycyclic molecule. It features a central benzene ring substituted with a 4-methoxyphenyl group, a 4-hydroxyphenyl group, and a 4-hydroxy-2-(4-hydroxyphenyl)-2-propynyl group. A cyclohexenone ring is fused to the central benzene ring.



The <sup>13</sup>C NMR spectrum of Selaginellin M shows 25 distinct peaks. The x-axis represents the chemical shift in ppm, ranging from 190 to 50. The peaks are labeled with their corresponding chemical shift values: 185.70, 169.99, 160.79, 156.09, 157.79, 156.70, 145.66, 145.22, 143.97, 138.47, 138.06, 135.02, 132.72, 131.68, 131.20, 130.49, 129.32, 129.11, 128.29, 126.82, 126.81, 121.48, 115.50, 114.72, 113.59, 113.37, 98.81, 83.85, 62.35, 59.62, and 54.81.

**Figure S8:**  $^1\text{H}$ - $^1\text{H}$  COSY of compound **2**

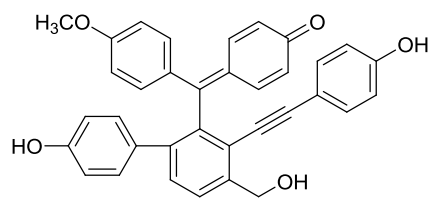

Selaginellin M

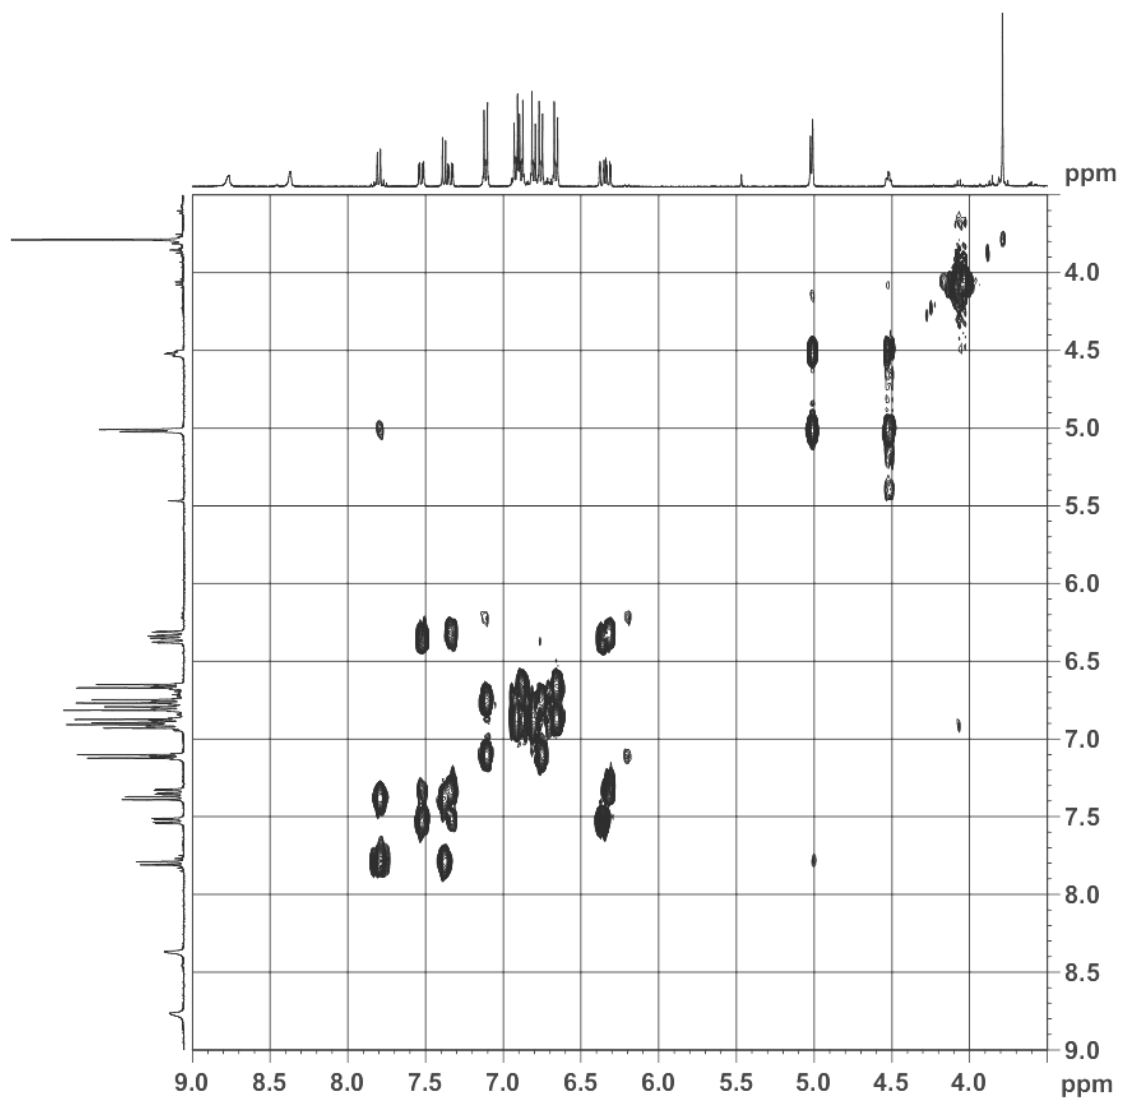



**Figure S9:** HMQC of compound **2**

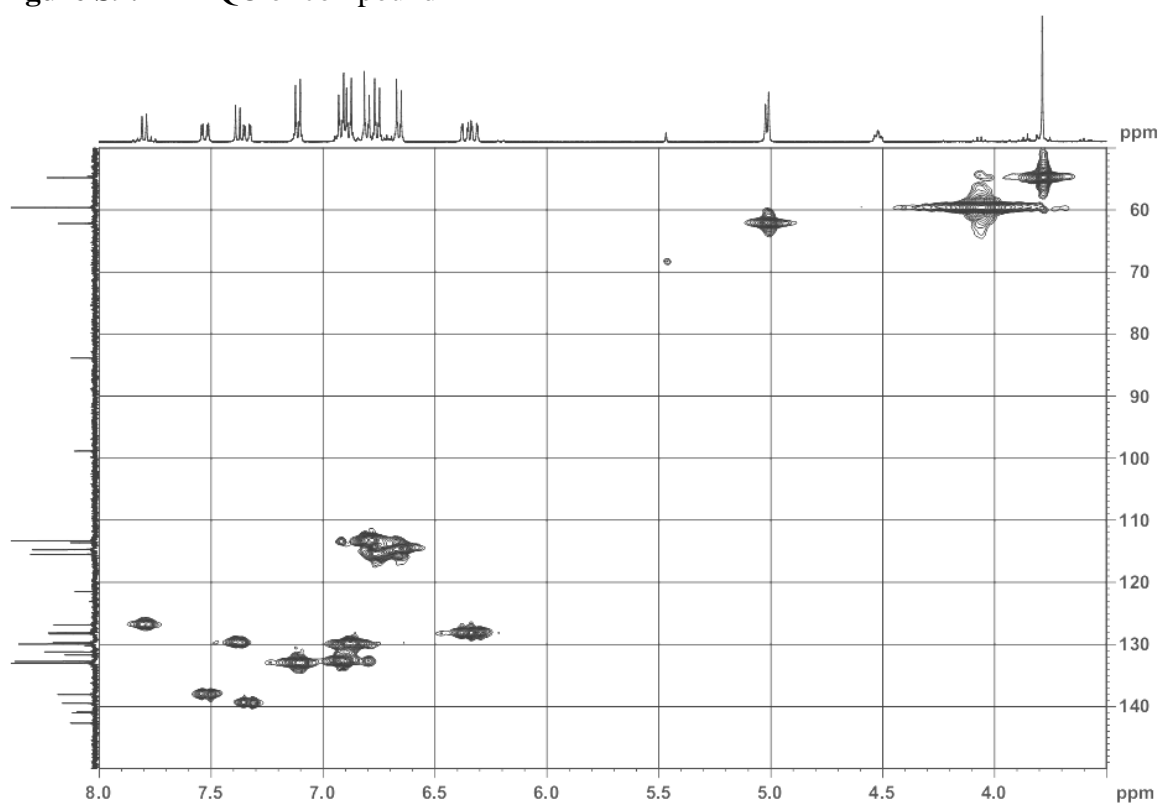

**Figure S10:** HMBC of compound **2**

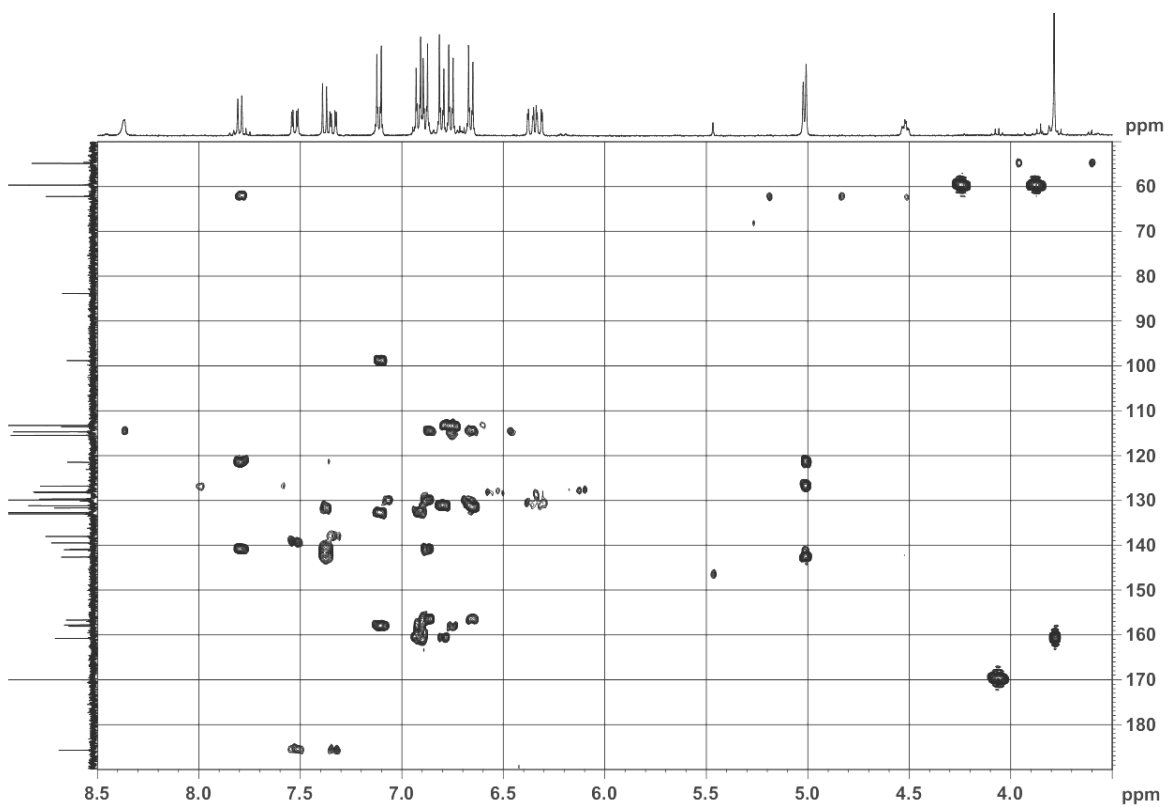

**Figure S11:**  $^1\text{H}$  NMR (400 MHz,  $\text{CD}_3\text{COCD}_3$ ) of compound **3**

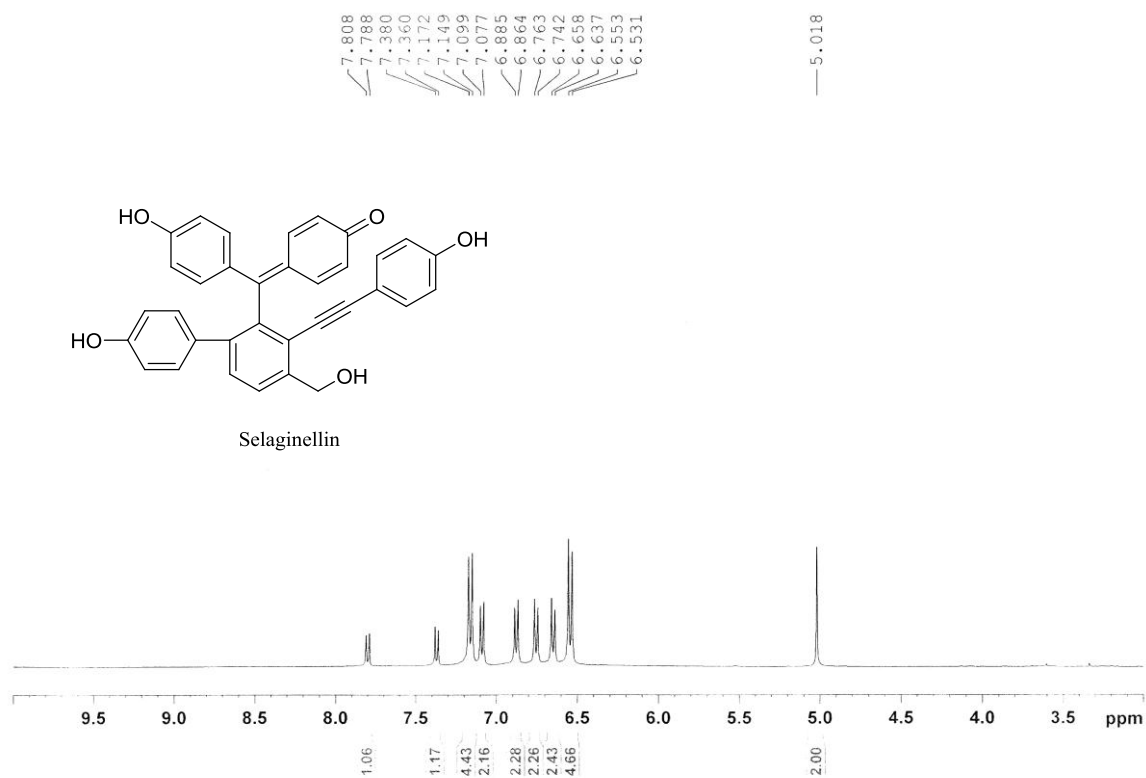

**Figure S12:**  $^{13}\text{C}$  NMR (100 MHz,  $\text{CD}_3\text{COCD}_3$ ) of compound **3**

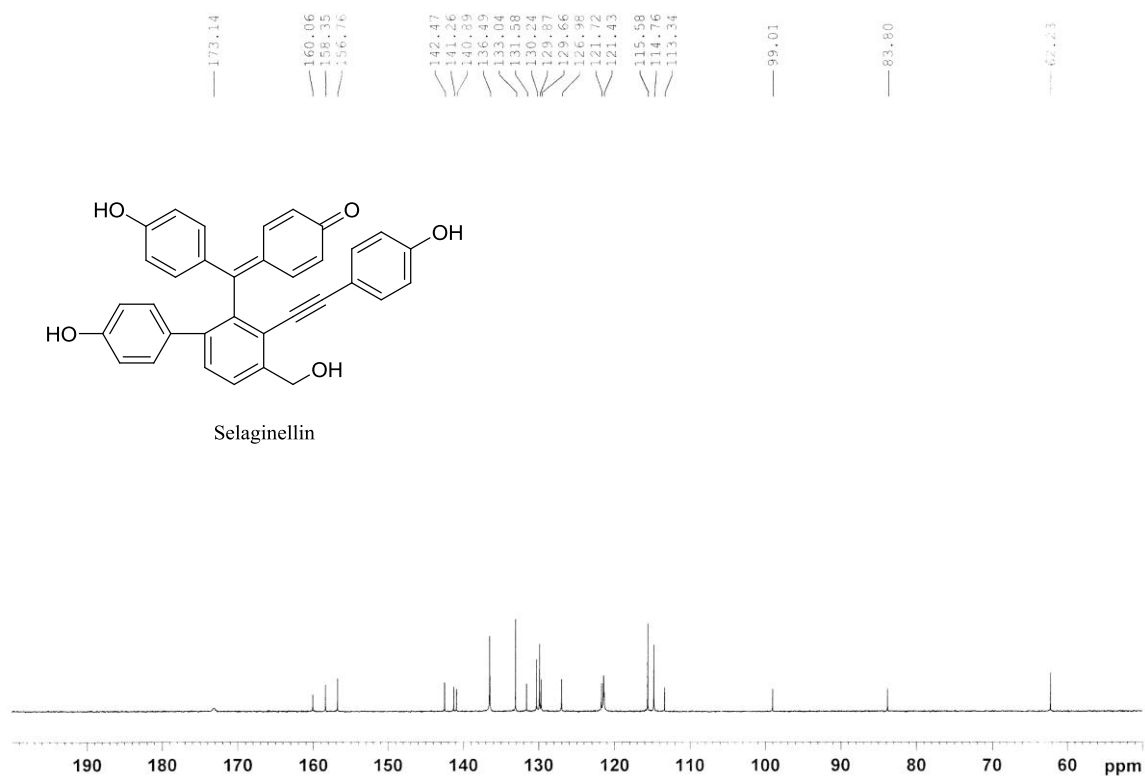

**Figure S13:**  $^1\text{H}$ - $^1\text{H}$  COSY of compound **3**

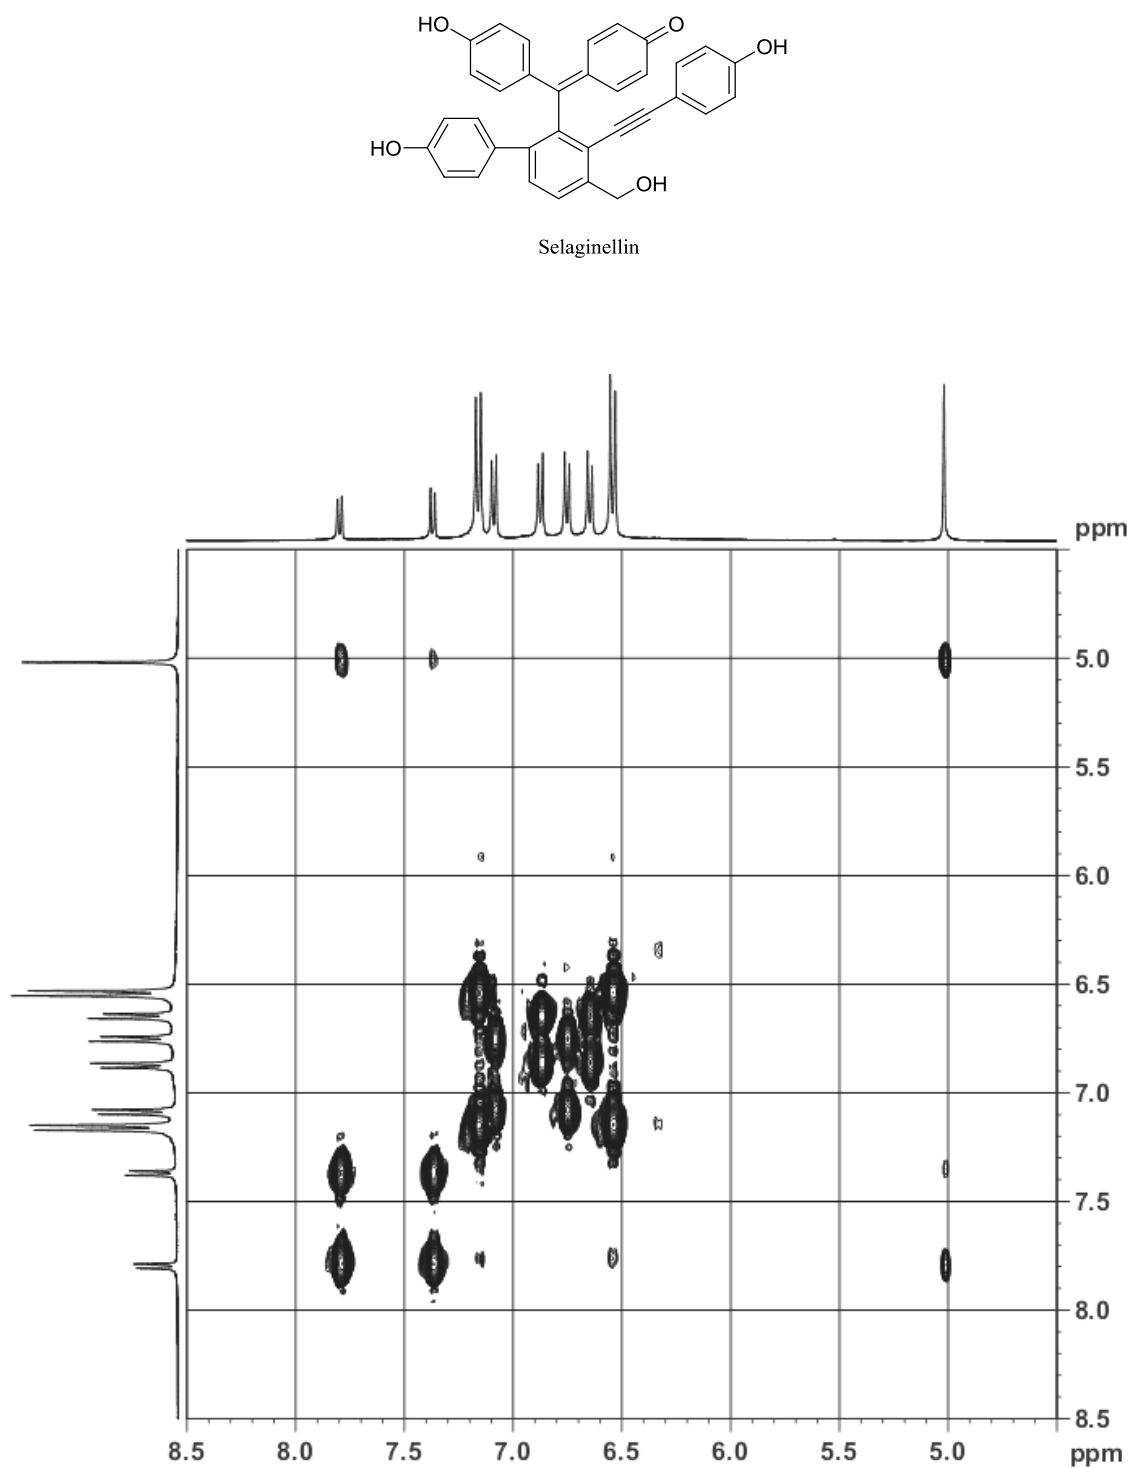

**Figure S14:** HMQC of compound **3**

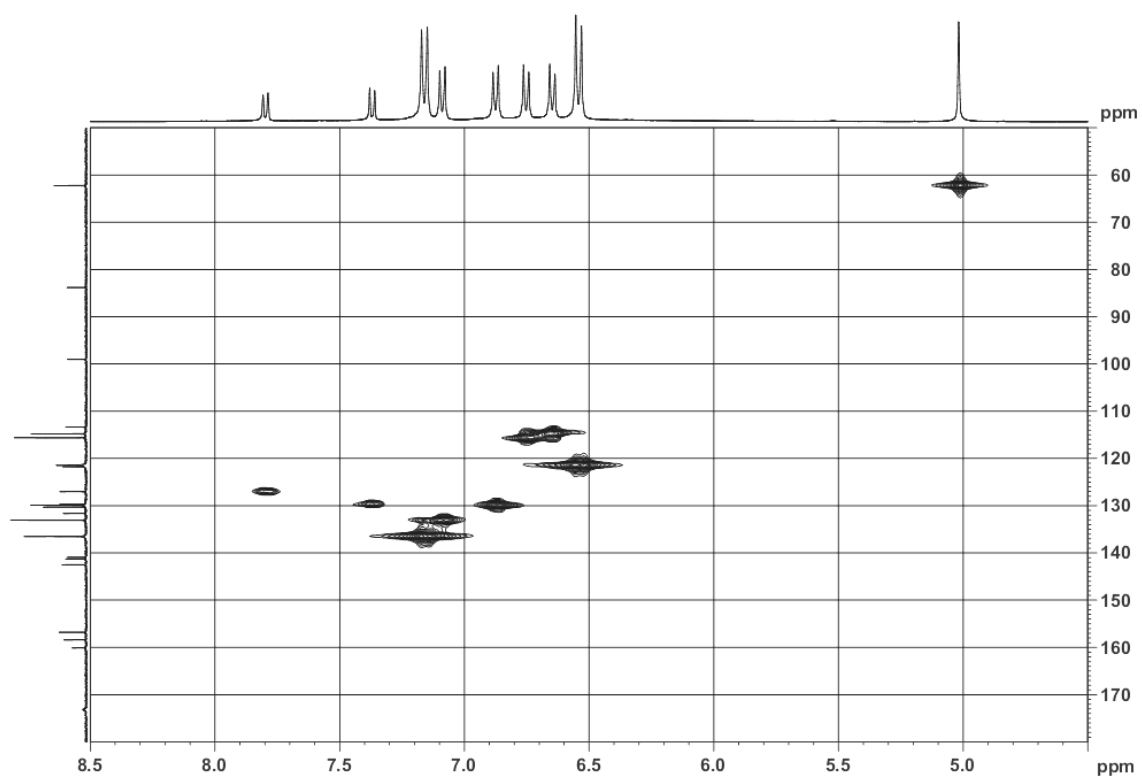

**Figure S15:** HMBC of compound **3**

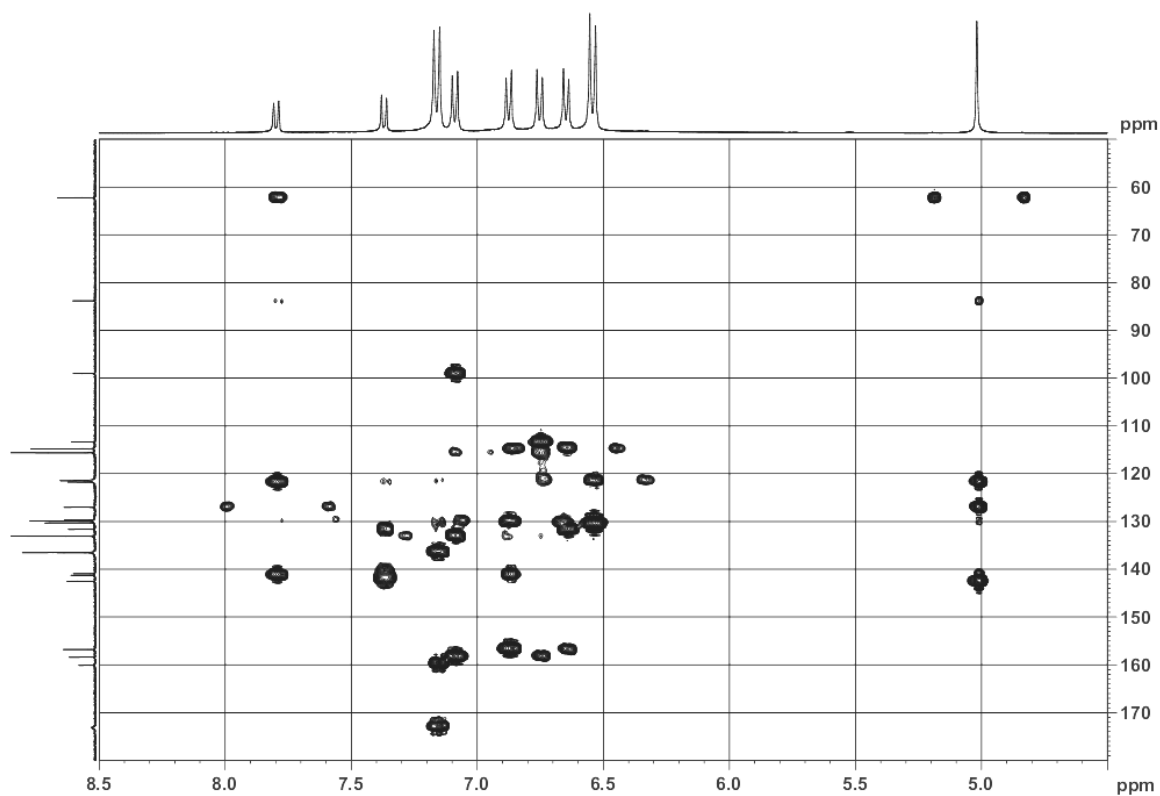

**Figure S16:**  $^1\text{H}$  NMR (400 MHz,  $\text{CD}_3\text{COCD}_3$ ) of compound **4**

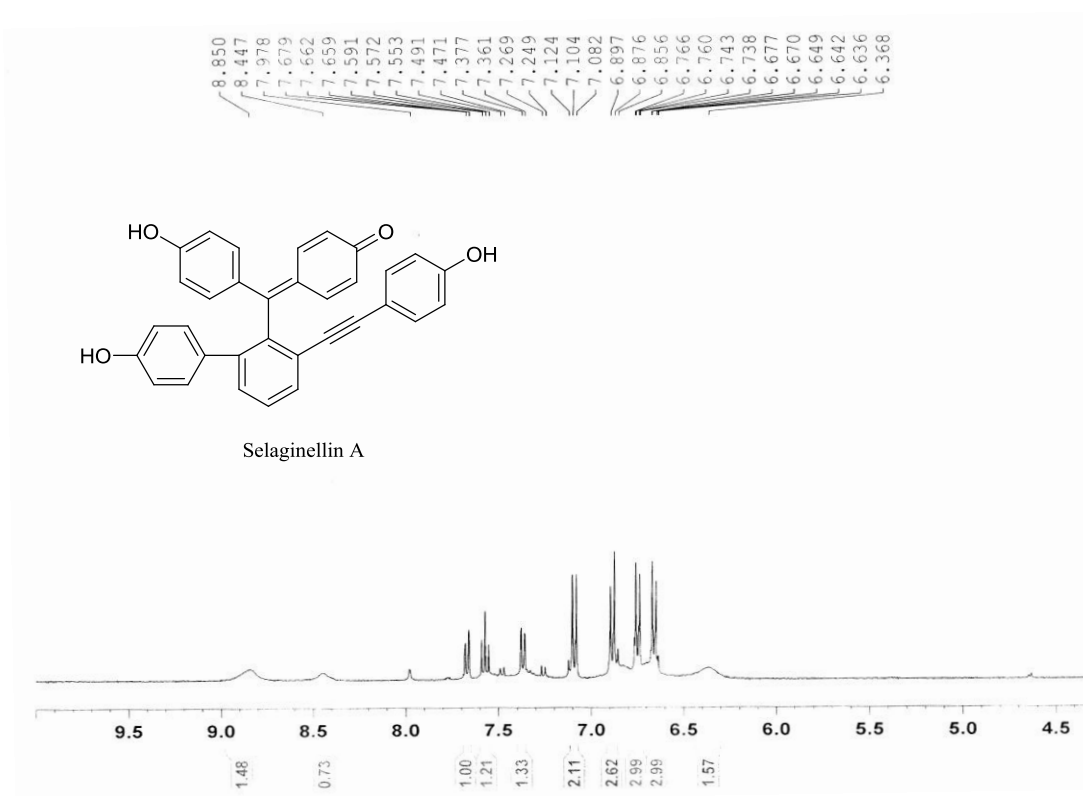

**Figure S17:**  $^{13}\text{C}$  NMR (100 MHz,  $\text{CD}_3\text{COCD}_3$ ) of compound **4**

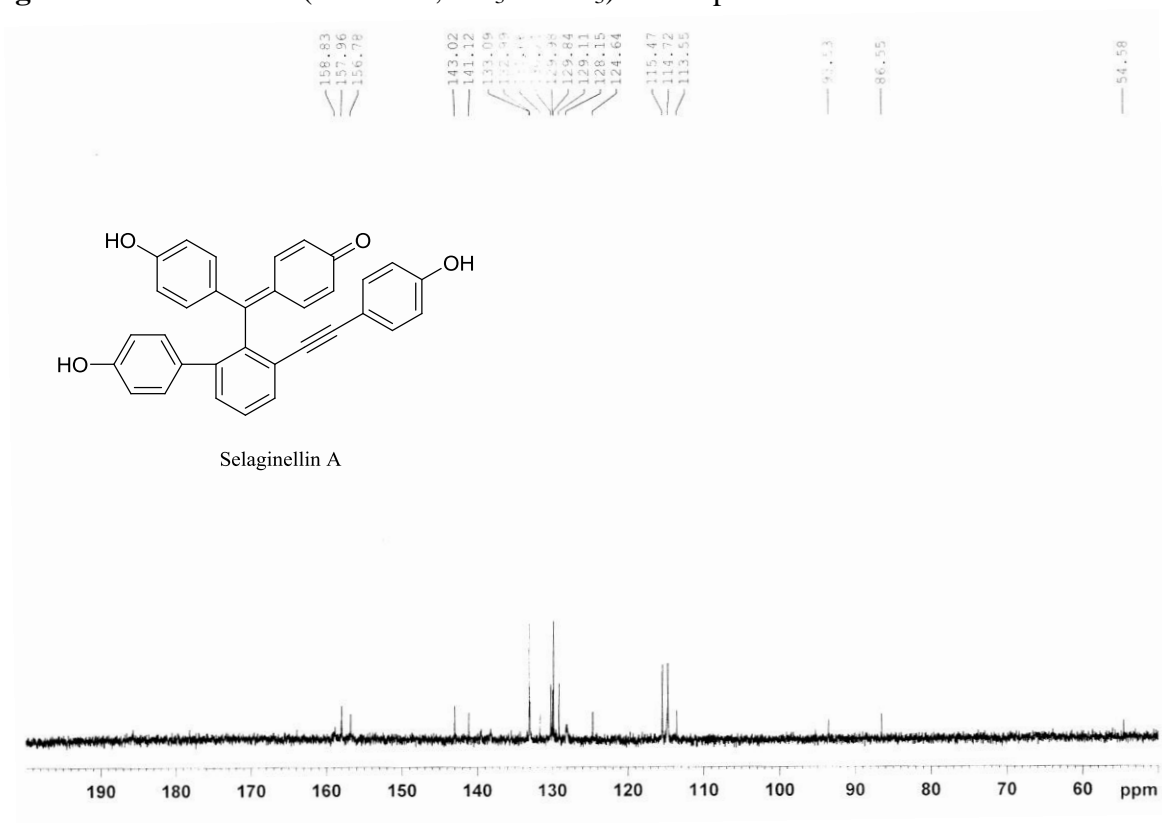

**Figure S18:**  $^1\text{H}$ - $^1\text{H}$  COSY of compound **4**

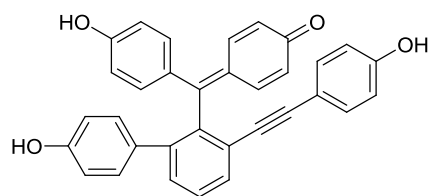

Selaginellin A

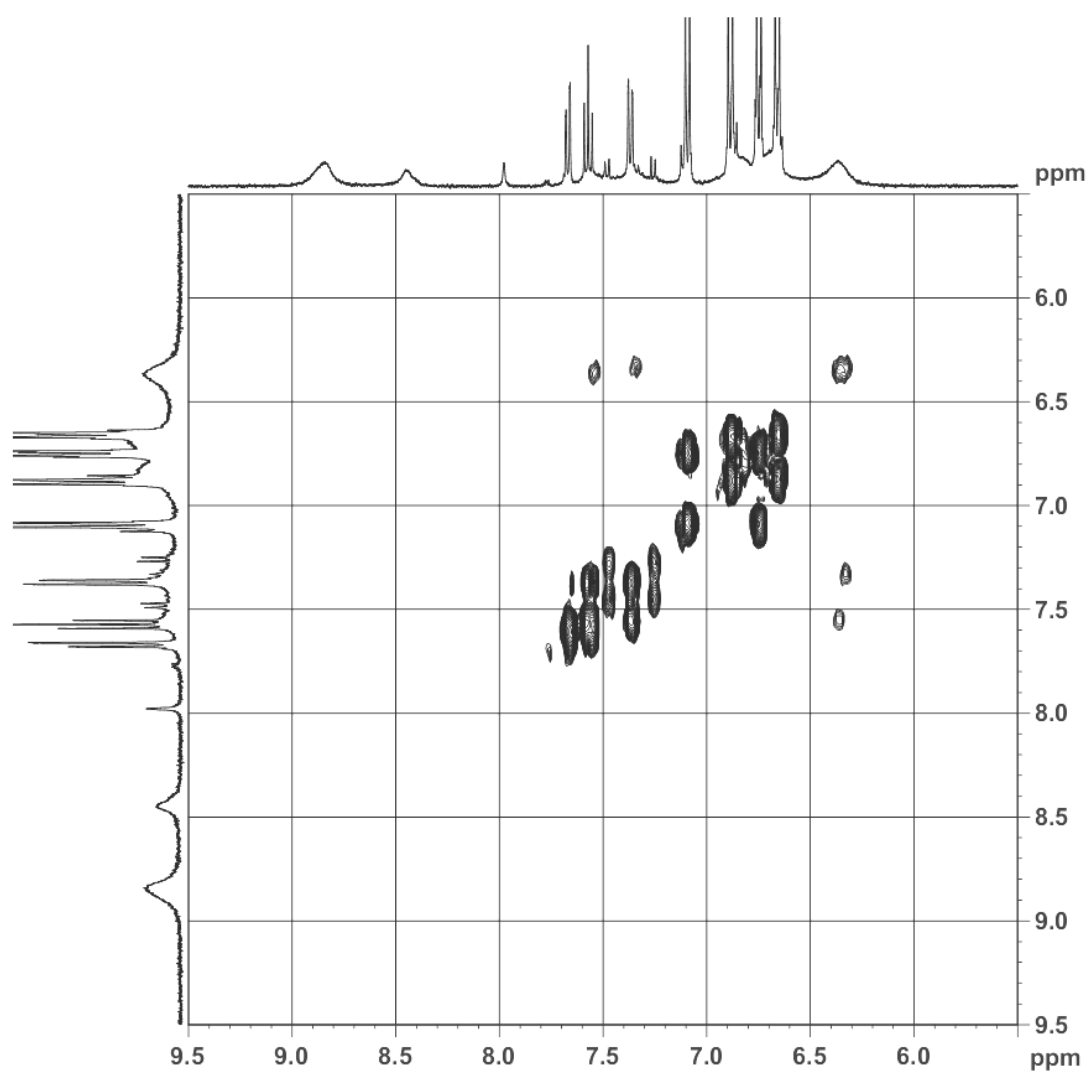

**Figure S19:** HMQC of compound **4**

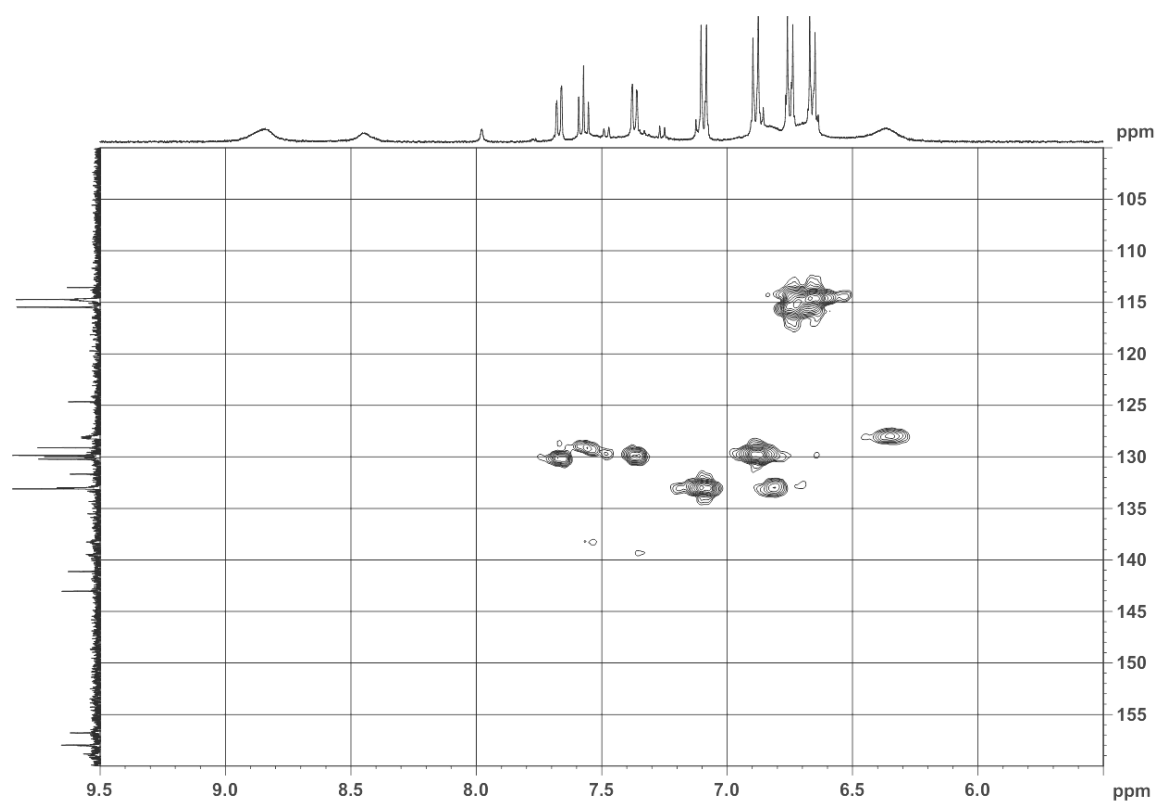

**Figure S20:** HMBC of compound **4**

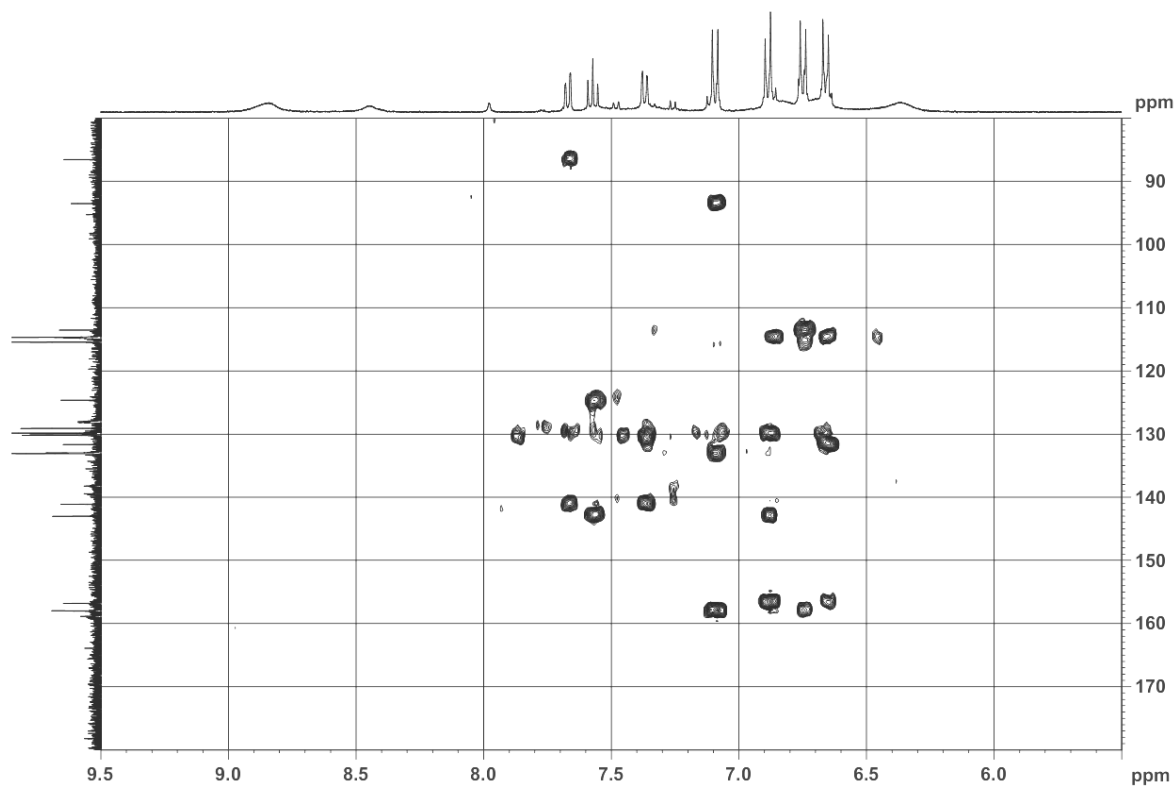

**Table S1:** Cytotoxic activity of compounds **1–3** evaluated with MTT assay.

| Compounds              | IC <sub>50</sub> (μM ± SD) <sup>a</sup> |
|------------------------|-----------------------------------------|
| <b>1</b>               | 26.4 ± 0.80                             |
| <b>2</b>               | 28.5 ± 0.64                             |
| <b>3</b>               | 33.1 ± 1.21                             |
| Cisplatin <sup>b</sup> | 15.4 ± 1.10                             |

<sup>a</sup>The values represent means ± SD of three independent experiments<sup>b</sup>Positive control**Table S2:** Antioxidant activity of compounds **1–3** evaluated with ABTS and FRAP assays<sup>a</sup>

| Compounds           | ABTS assay                 | FRAP assay                        |
|---------------------|----------------------------|-----------------------------------|
|                     | IC <sub>50</sub> (μM ± SD) | Fe <sup>II</sup> (μmol/μmol ± SD) |
| <b>1</b>            | 2.94 ± 0.014               | 1.10 ± 0.058                      |
| <b>2</b>            | 3.02 ± 0.029               | 1.05 ± 0.056                      |
| <b>3</b>            | 3.07 ± 0.012               | 0.94 ± 0.050                      |
| Trolox <sup>b</sup> | 5.23 ± 0.019               | 0.87 ± 0.043                      |

<sup>a</sup>Values are mean ± SD of three separated experiments.<sup>b</sup>Reference compound.
